# Supplementary material for: XFEM-Based Study on Fatigue Crack Propagation in The Rocket Deflector Trough under Coupled High-Temperature and Impact Conditions
Source: Preprints.org preprint supplement (doi:10.20944/preprints202312.2112.v1), 2023-12-28
Supplement: Supplementary file 11 [file supplementary]

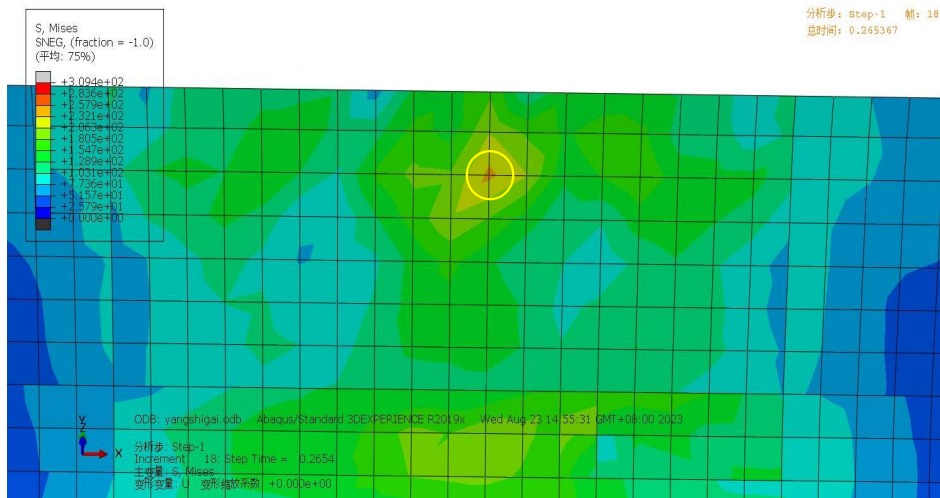

a) Condition A: Cracks are positioned at the locations of maximum stress

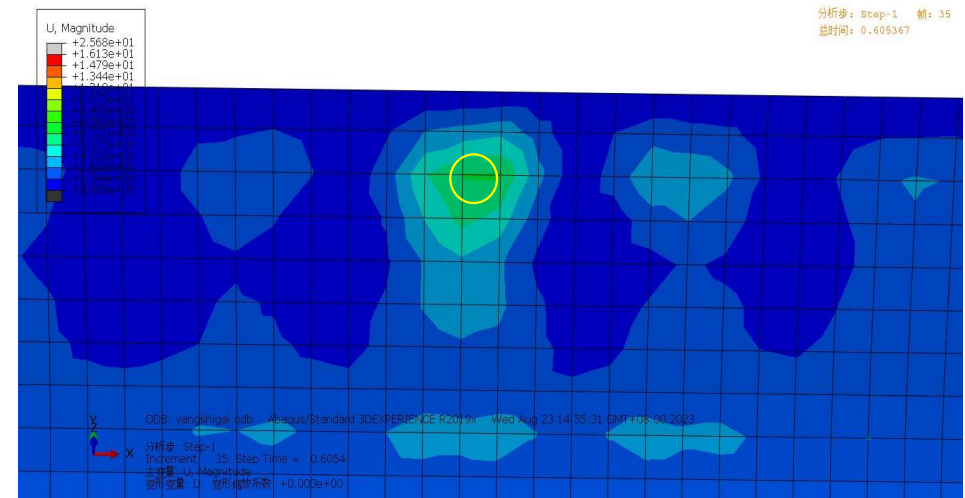

b) Condition B: Cracks are positioned at locations of maximum deformation
