# Supplementary material for: XFEM-Based Study on Fatigue Crack Propagation in The Rocket Deflector Trough under Coupled High-Temperature and Impact Conditions
Source: Preprints.org preprint supplement (doi:10.20944/preprints202312.2112.v1), 2023-12-28
Supplement: Supplementary file 15 [file supplementary]

Archive with 15 entries (15 files):
- 1.pdf
- 2.pdf
- 3.pdf
- 4.pdf
- 5.pdf
- 6.pdf
- 7.pdf
- 8.pdf
- 9.pdf
- 10.pdf
- 11.pdf
- 12.pdf
- 13.pdf
- 14.pdf
- 15.pdf
