# Supplementary figures and images for: XFEM-Based Study on Fatigue Crack Propagation in The Rocket Deflector Trough under Coupled High-Temperature and Impact Conditions
Source: Preprints.org preprint supplement (doi:10.20944/preprints202312.2112.v1), 2023-12-28

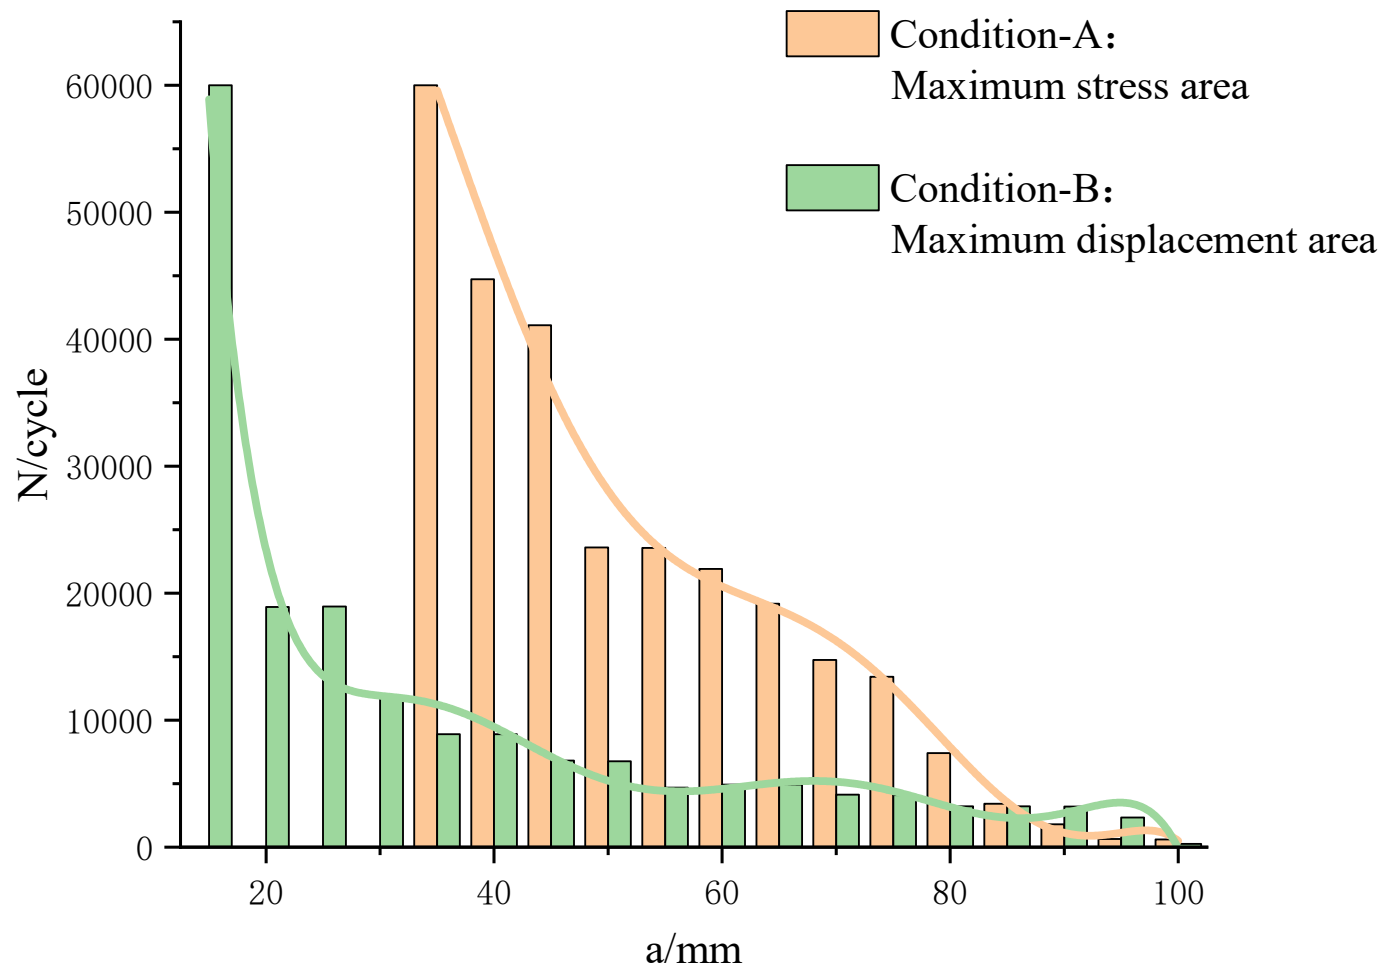

Supplement: Supplementary file 1 [file supplementary]

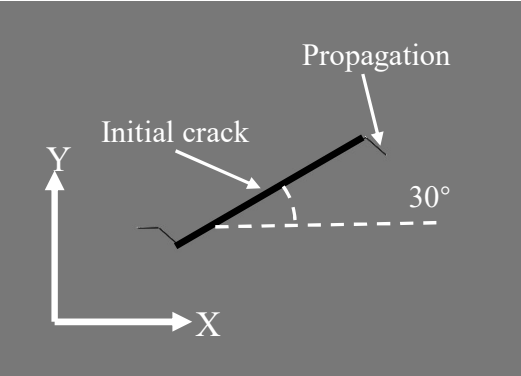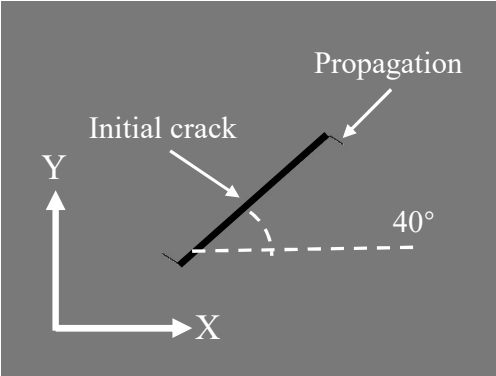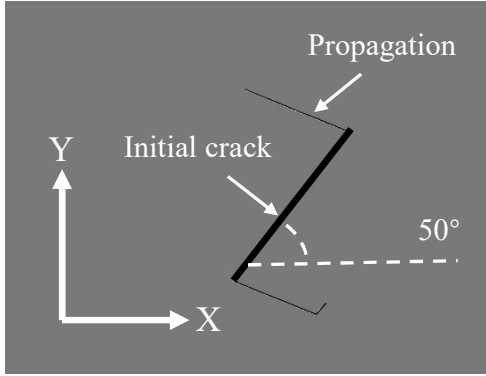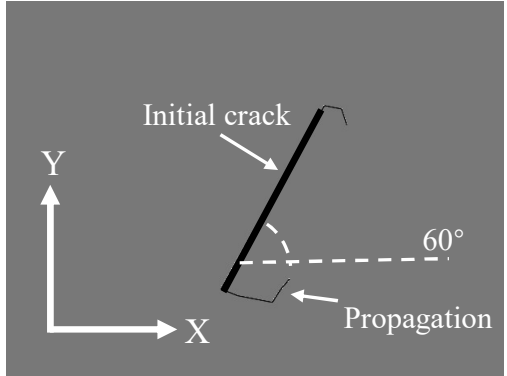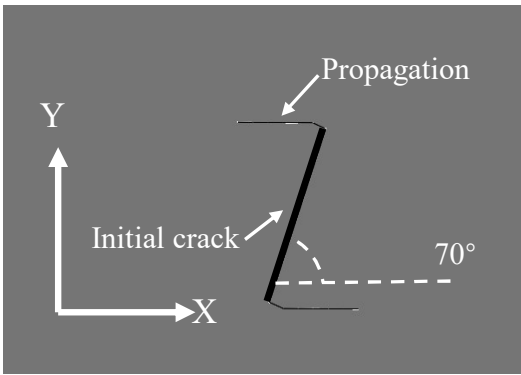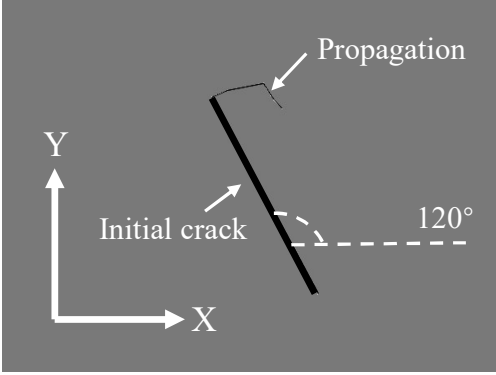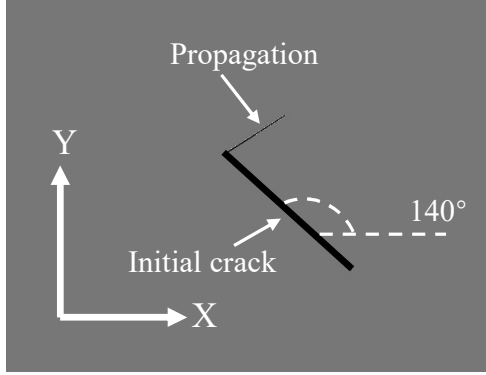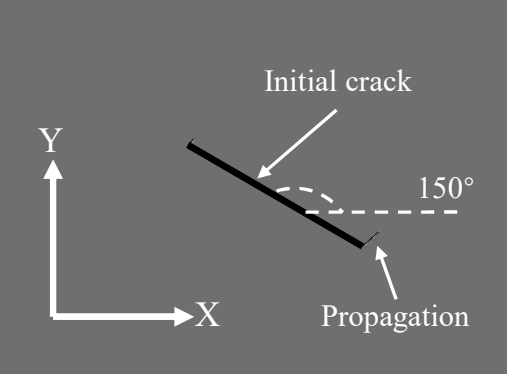

Supplement: Supplementary file 2 [file supplementary]

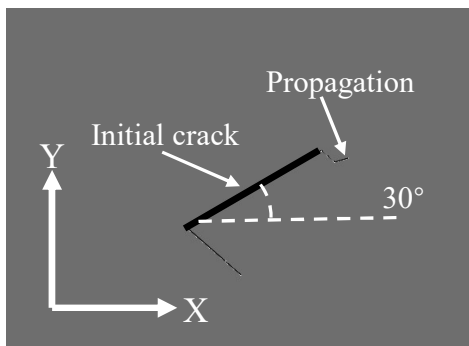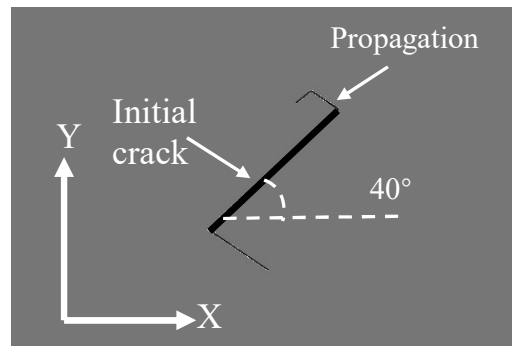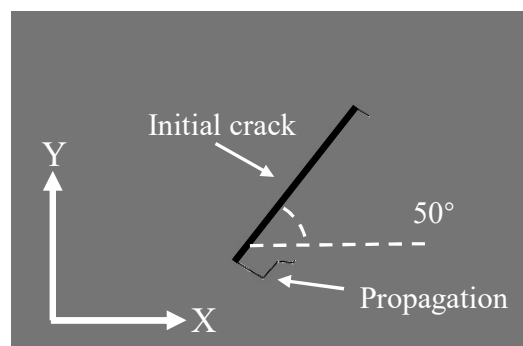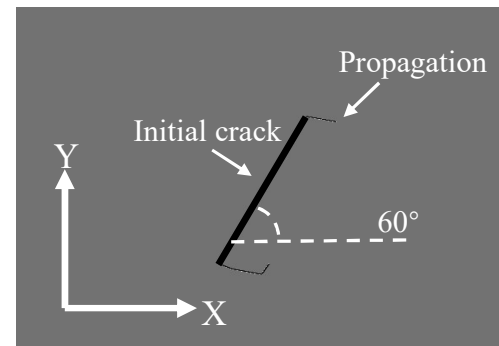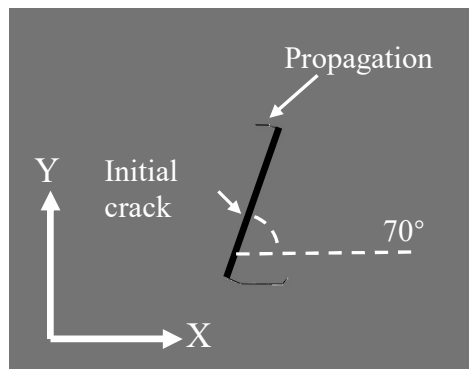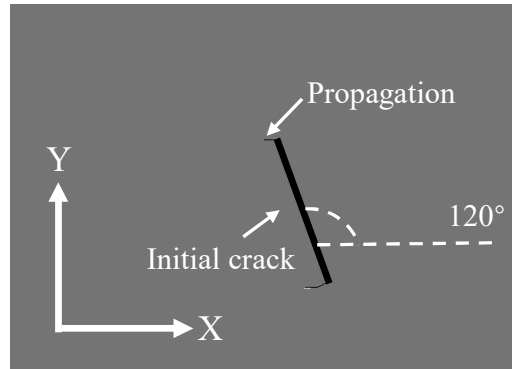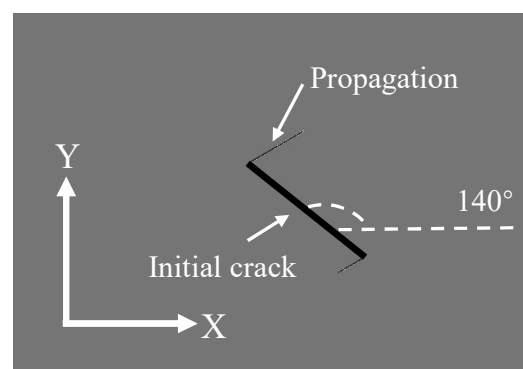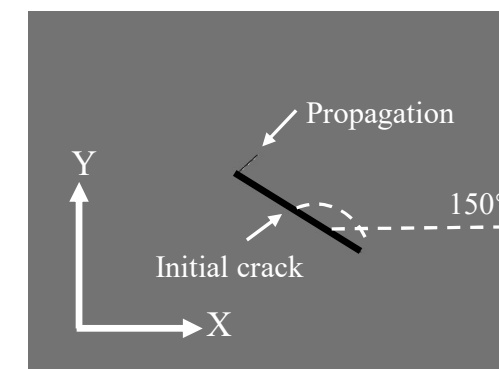

Supplement: Supplementary file 3 [file supplementary]

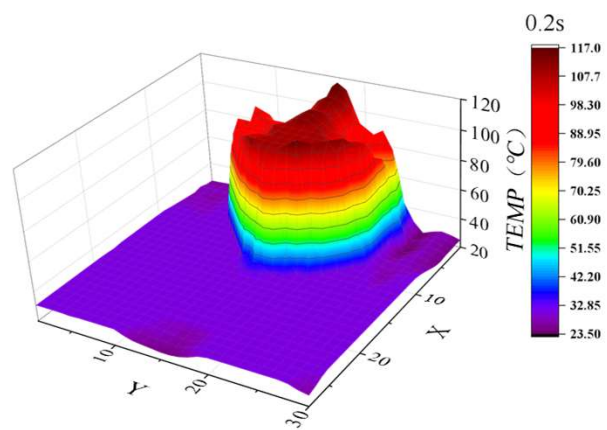

a)

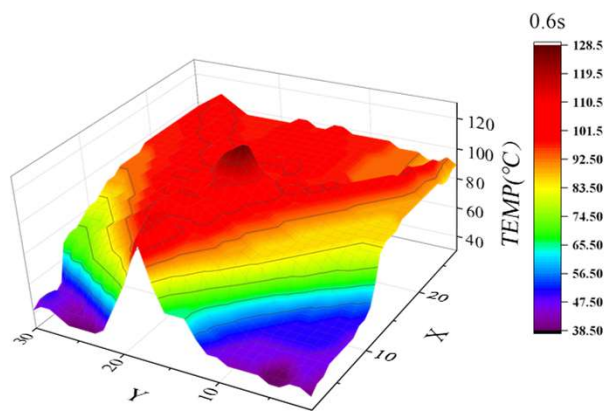

b)

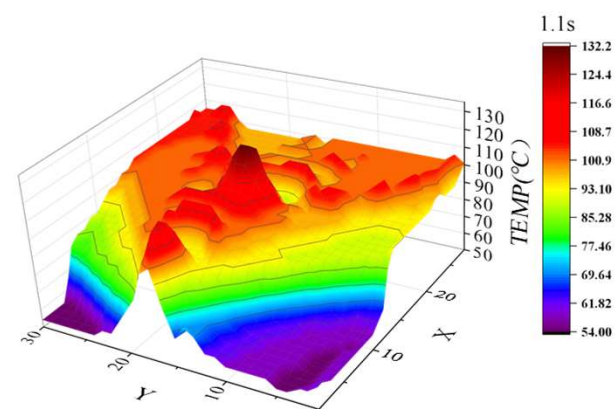

c)

Supplement: Supplementary file 4 [file supplementary]

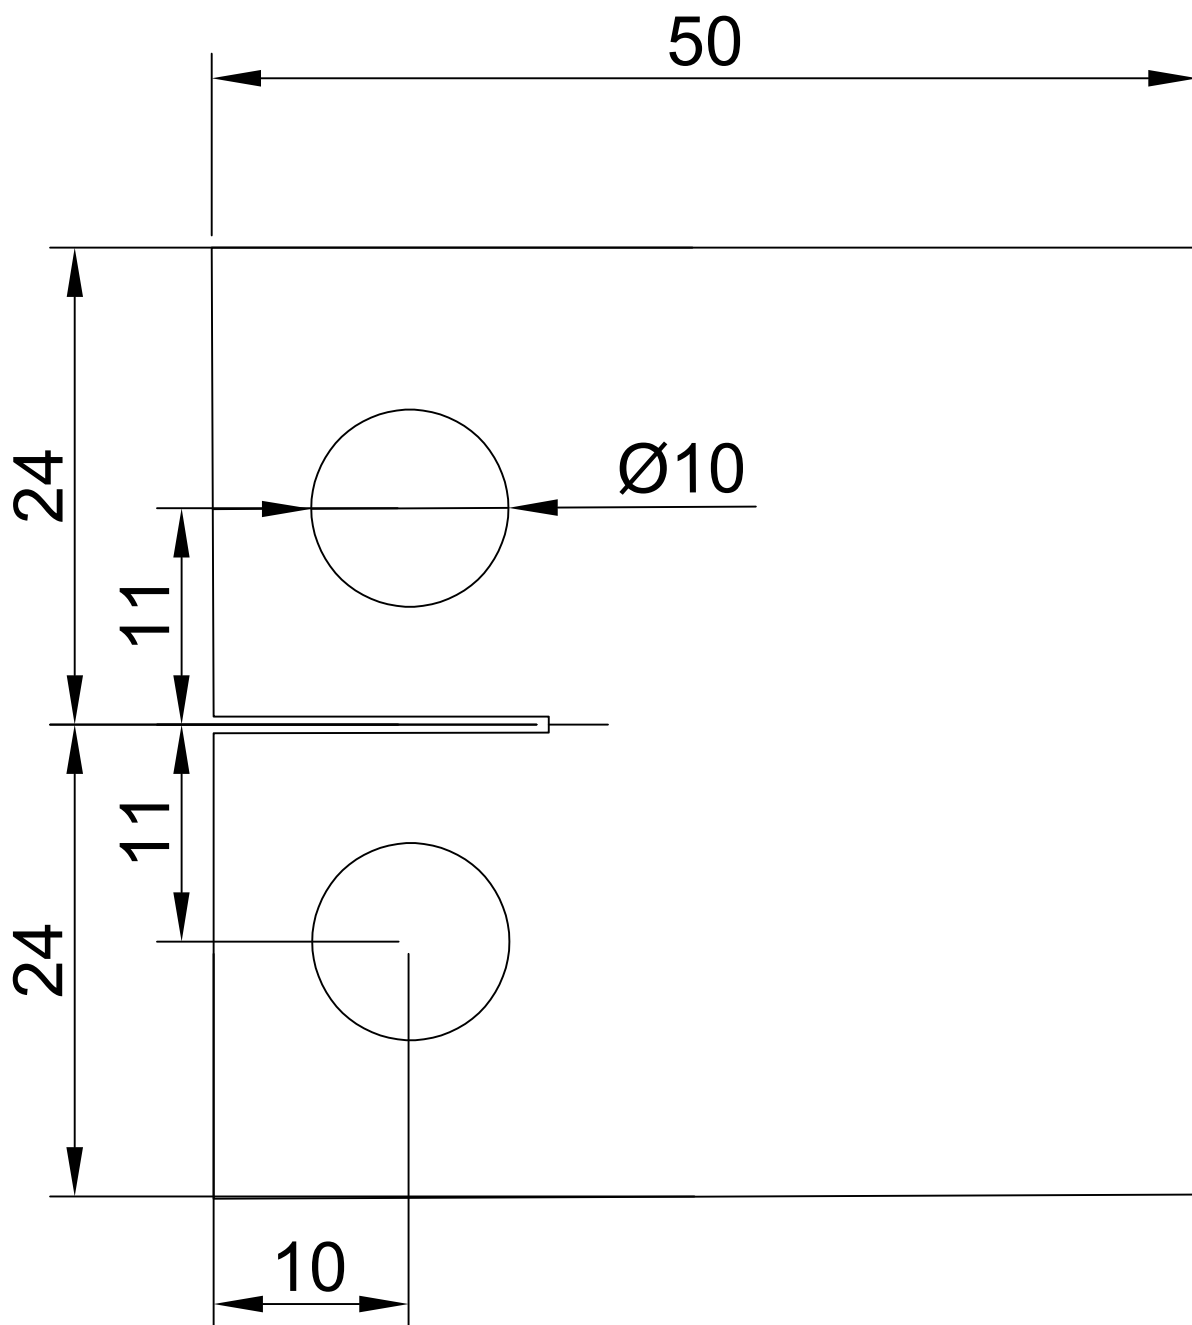

Supplement: Supplementary file 5 [file supplementary]

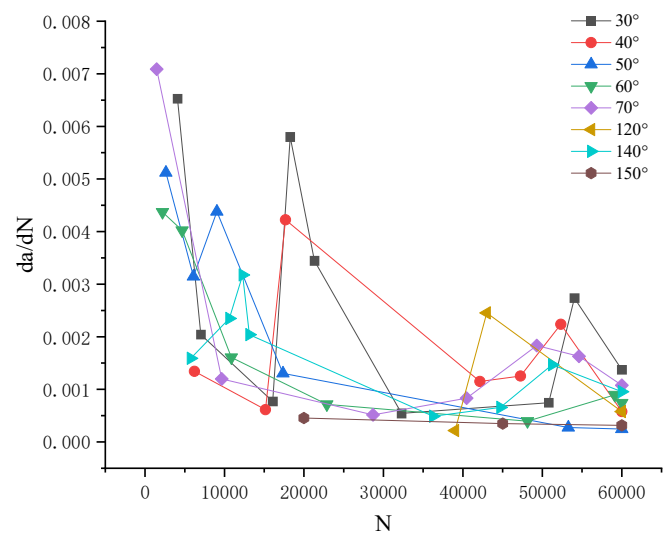

a) Condition A

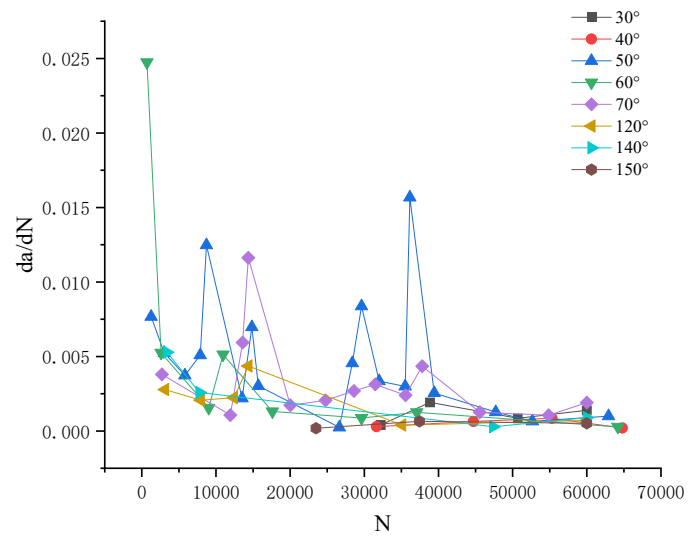

b) Condition B

Supplement: Supplementary file 6 [file supplementary]

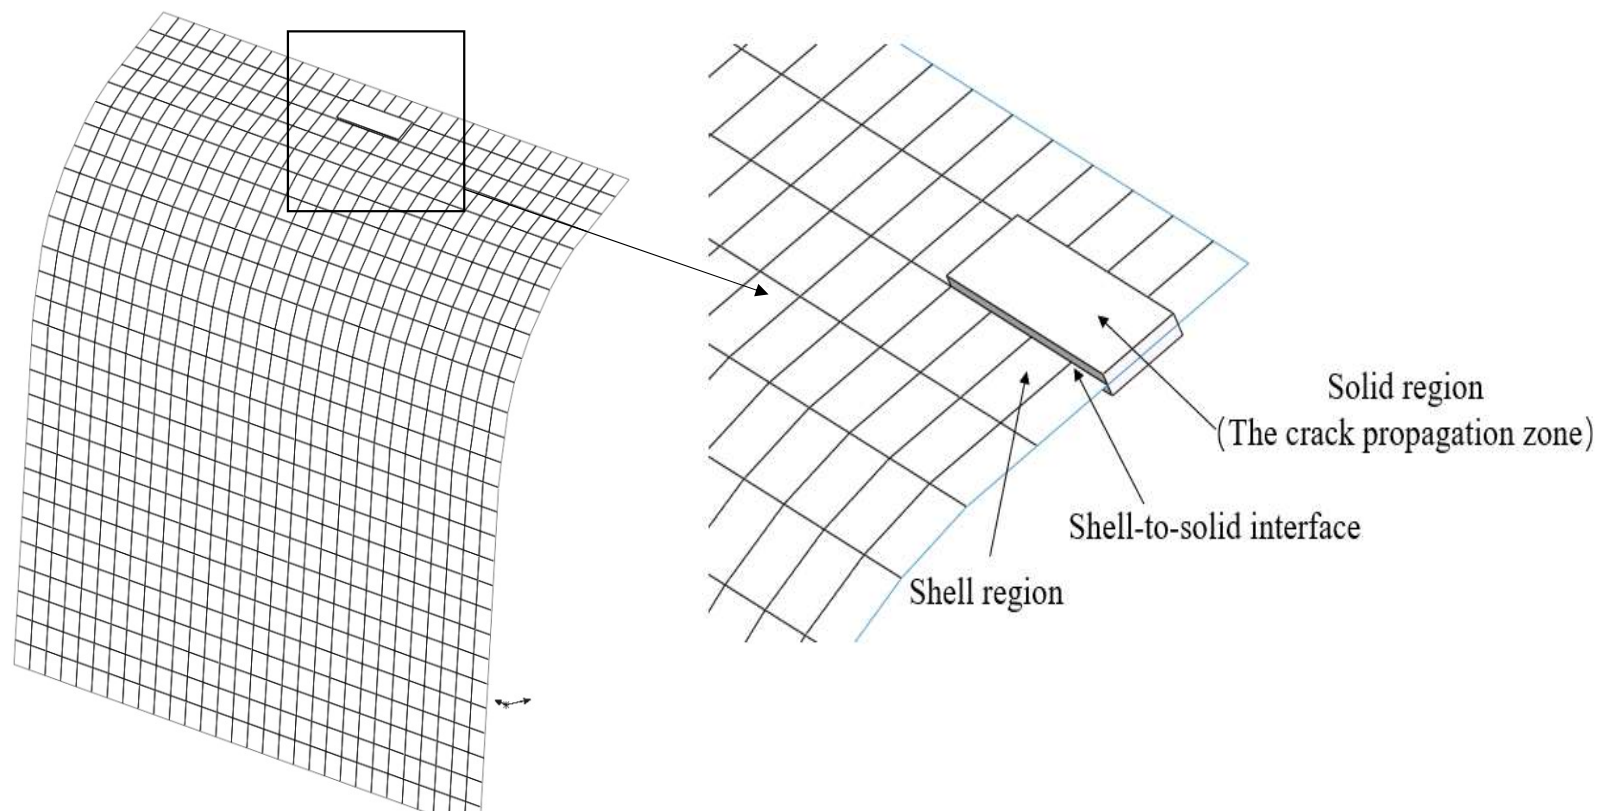

Supplement: Supplementary file 7 [file supplementary]

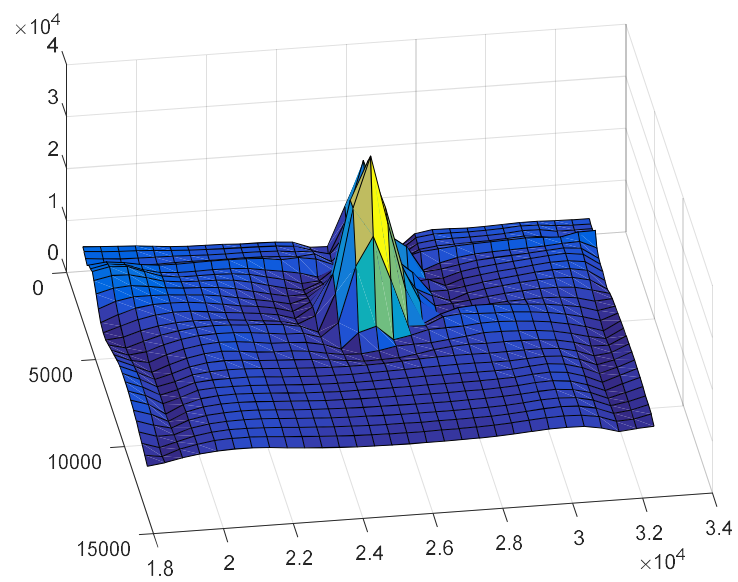

a) 0.2s

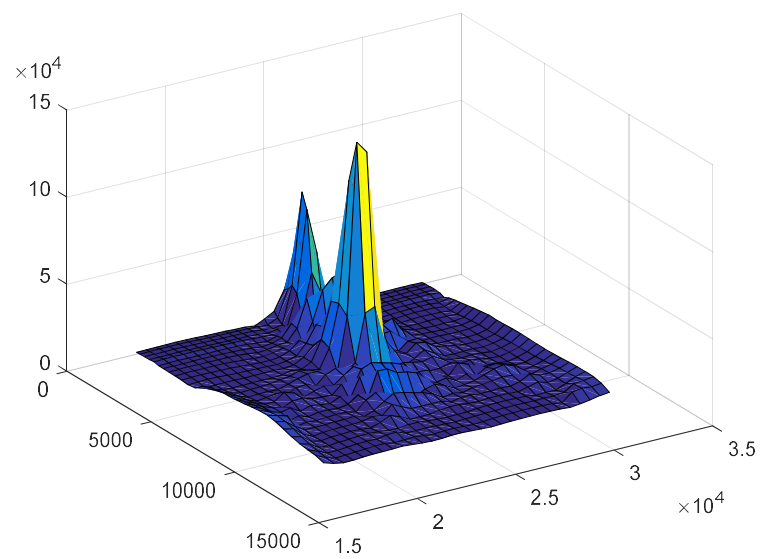

b) 1.1s

Supplement: Supplementary file 8 [file supplementary]

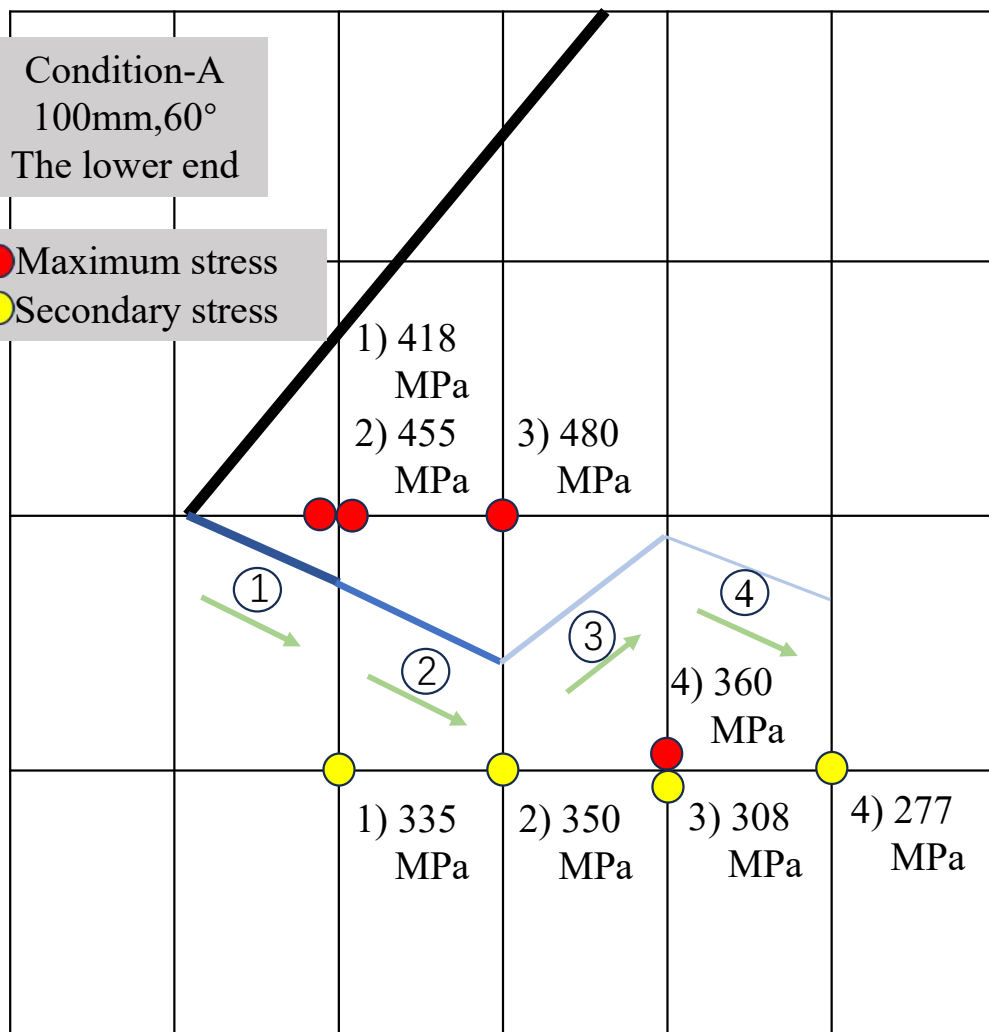

a)

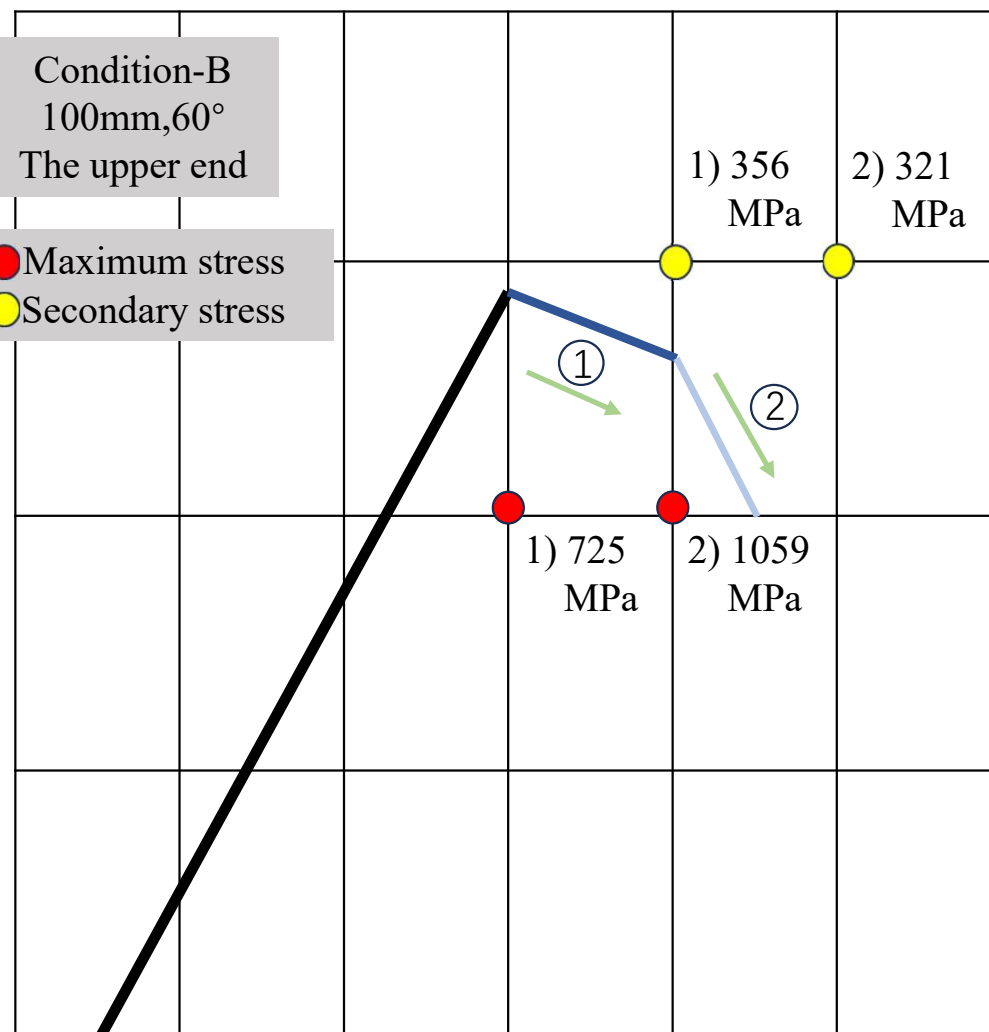

b)

Supplement: Supplementary file 9 [file supplementary]

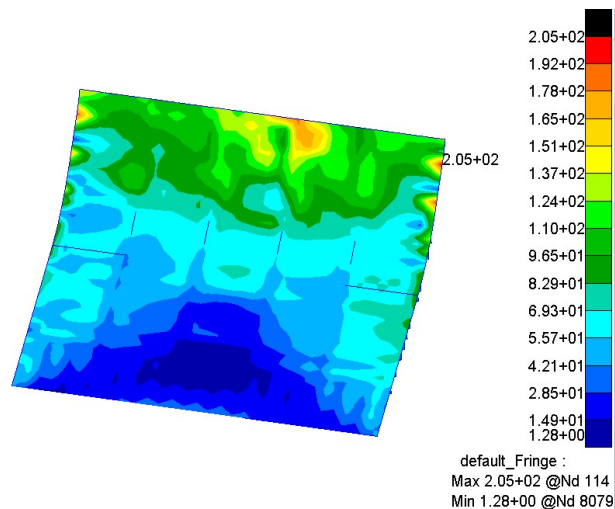

a) Temperature load

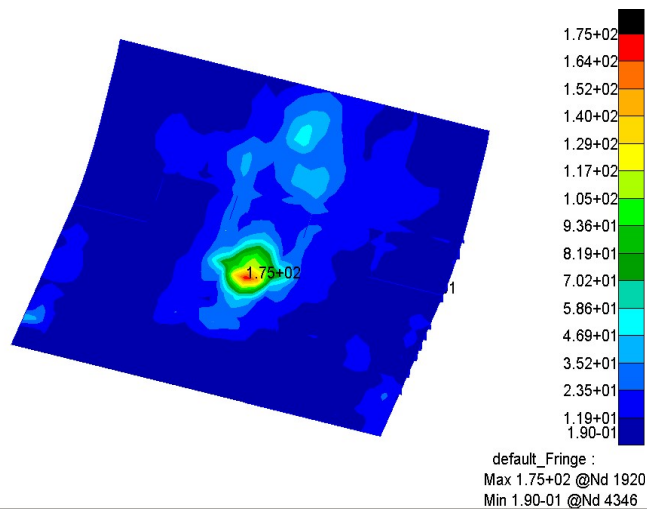

b) Impact force load

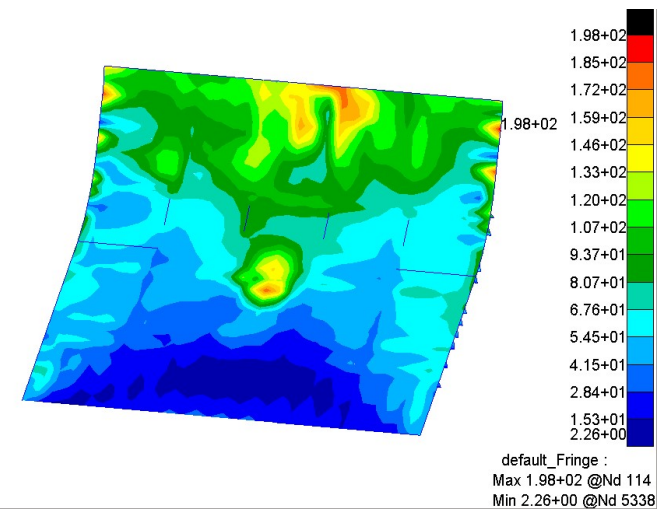

c) Coupled load

Supplement: Supplementary file 10 [file supplementary]

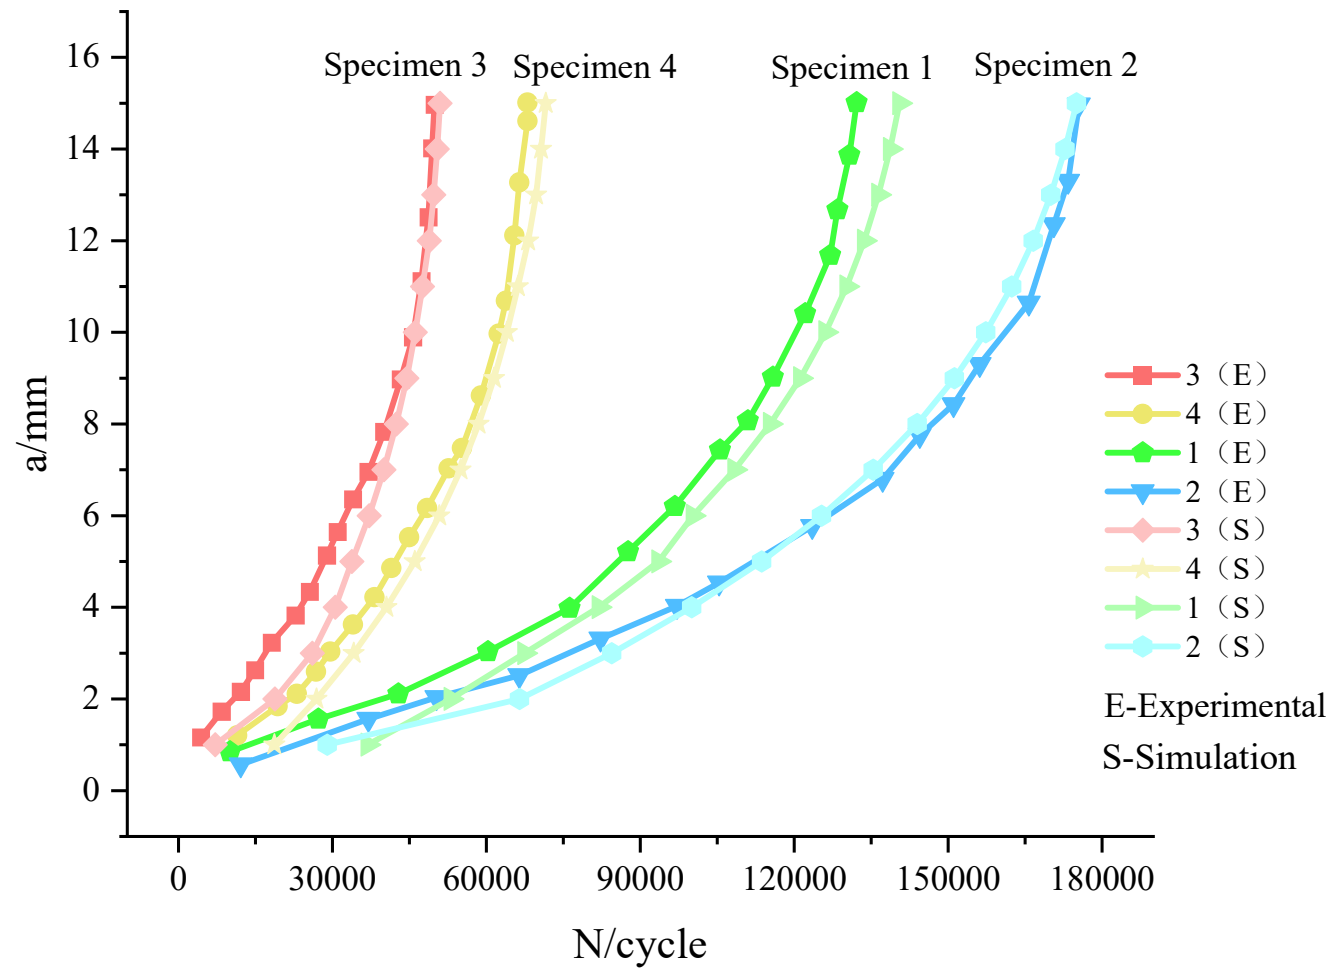

Supplement: Supplementary file 12 [file supplementary]

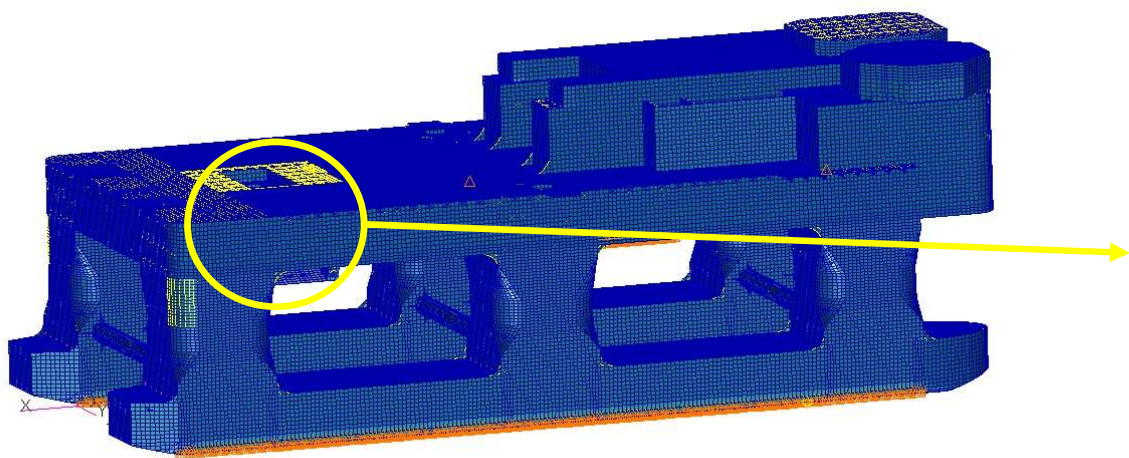

a) Rocket launch platform model

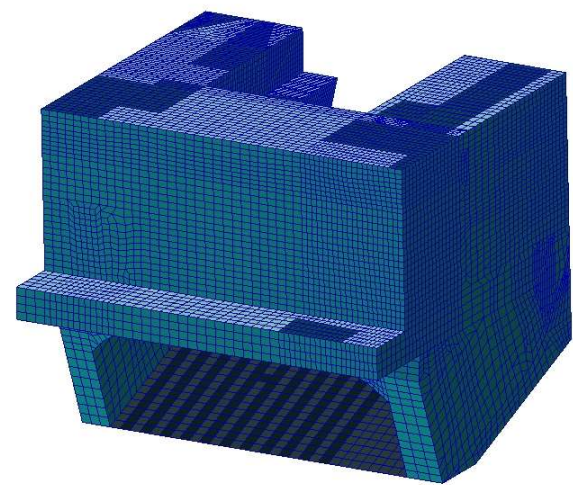

b) Rocket deflector trough model

Supplement: Supplementary file 13 [file supplementary]

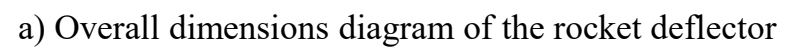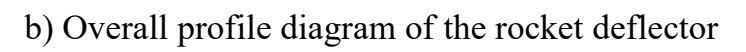

Supplement: Supplementary file 14 [file supplementary]

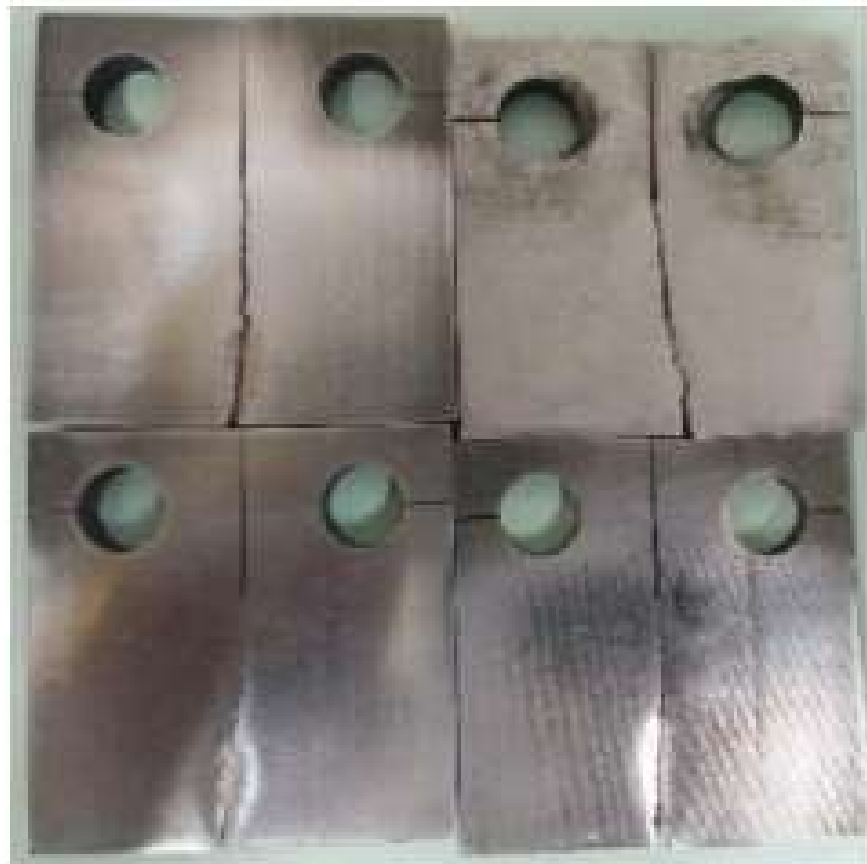

Supplement: Supplementary file 15 [file supplementary › 6.pdf]
